# Supplementary material for: A side-on Mn(iii)–peroxo supported by a non-heme pentadentate N3Py2ligand: synthesis, characterization and reactivity studies
Source: Royal Society of Chemistry journal article supplement (doi:10.1039/d0dt03706k), 2021-01-01
Supplement: d0dt03706k1.pdf [file d0dt03706k1.pdf]

## Supporting Information

### **A side-on Mn(III)-peroxo supported by a non-heme pentadentate N3Py2 ligand: Synthesis, characterization and reactivity studies**

Dattaprasad D. Narulkar<sup>a,b</sup>, Azaz Ansari<sup>c</sup>, Anil Kumar Vardhaman<sup>d</sup>, Sarvesh S. Harmalkar<sup>a</sup>, Giribabu Lingamallu<sup>d</sup>, Vishal M. Dhavale<sup>e</sup>, Muniyandi Sankaraligam<sup>f</sup>, Sandip Das<sup>g</sup>, Pankaj Kumar<sup>g</sup>, and Sunder N. Dhuri<sup>a\*</sup>

\* Corresponding author

Tel.: +91 8669609172; E-mail: [sndhuri@unigoa.ac.in](mailto:sndhuri@unigoa.ac.in).

<sup>a</sup>*School of Chemical Sciences, Goa University, Goa-403206, India.*

<sup>b</sup>*Department of Chemistry, Dnyanprassarak Mandal's College and Research Centre, Assagao, Goa-403507, India.*

<sup>c</sup>*Department of Chemistry, Central University of Haryana, Mahendergarh-123031, Haryana.*

<sup>d</sup>*Polymers & Functional Materials Division, CSIR-Indian Institute of Chemical Technology, Uppal Road, Tarnaka, Hyderabad-500007, India*

<sup>e</sup>*CSIR-Central Electrochemical Research Institute, CSIR Madras Complex, Taramani, Chennai-600113, India.*

<sup>f</sup>*Bioinspired & Biomimetic Inorganic Chemistry Lab, Department of Chemistry, National Institute of Technology Calicut, Kozhikode, Kerala 673601, India.*

<sup>g</sup>*Indian Institute of Science Education and Research (IISER), Tirupati 517507, India*

**Magnetic moment calculation and determination of number of unpaired electrons in complex 1 and 1a:** Evans' method of <sup>1</sup>H-NMR was performed to determine the number of unpaired electrons (spin state) in complex **1** and **1a** at room temperature<sup>S1-S3</sup>. A WILMAD® coaxial insert (with a sealed capillary) tube containing the only CD<sub>3</sub>CN solvent (with 1.0% TMS) was inserted into the normal NMR tubes containing the complex **1** (3.0 mM, with 0.1% TMS) or **1a** (2.0 mM, with 0.1% TMS). We have calculated the chemical shift value of the TMS peak in the presence of the complex **1** or **1a** with respect to that of the TMS peak in the outer NMR tube. The magnetic moment was calculated using the given equation,

$$\mu_{eff} = 0.0618(\Delta\nu T / 2fM)^{1/2}$$

#### **Complex 1.**

$$\mu_{eff} = 0.0618 * (76 * 298 / 2 * 400 * 0.003)^{1/2}$$

$$\mu_{eff} = 5.97 \text{ BM}$$

#### **Complex 1a.**

$$\mu_{eff} = 0.0618 * (12 * 298 / 2 * 400 * 0.002)^{1/2}$$

$$\mu_{eff} = 2.91 \text{ BM}$$

Where f = oscillator frequency (400 MHz) of the superconducting spectrometer, T = absolute temperature, M = molar concentration of the complex **1** or **1a**, and  $\nu$  = difference in frequency (Hz) between the two TMS signals<sup>S3</sup>. The calculated magnetic moment of complexes **1** and **1a** were determined to be 5.97 BM and 2.91 BM respectively in CD<sub>3</sub>CN at RT, suggesting 5 unpaired electrons in Mn<sup>2+</sup> centre of complex **1** and 2 unpaired electrons in Mn<sup>3+</sup> centre of complex **1a**.

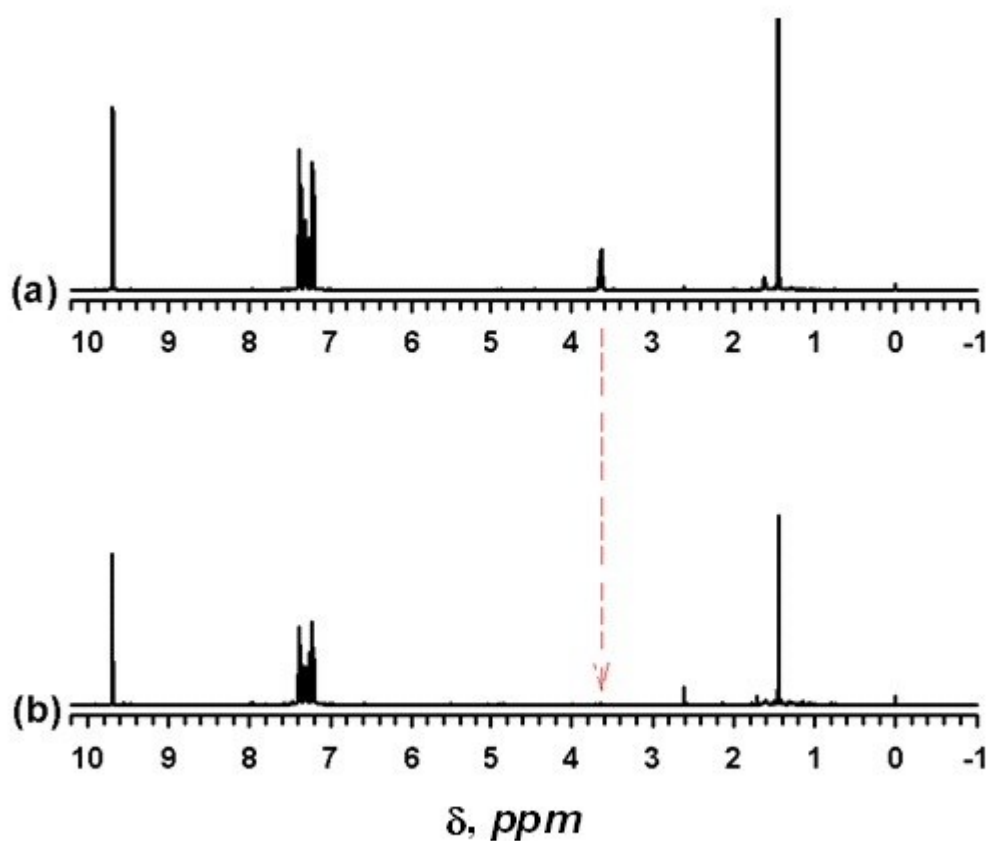

**Figure S1.**  $^1\text{H}$ -NMR spectra of (a) 2-phenylpropionaldehyde, (b) deuterated 2-phenylpropionaldehyde recorded in an  $\text{CDCl}_3$  at 298 K. The indicated arrow (red color) shows that the occurrence of the deuteration in the 2-phenylpropionaldehyde.

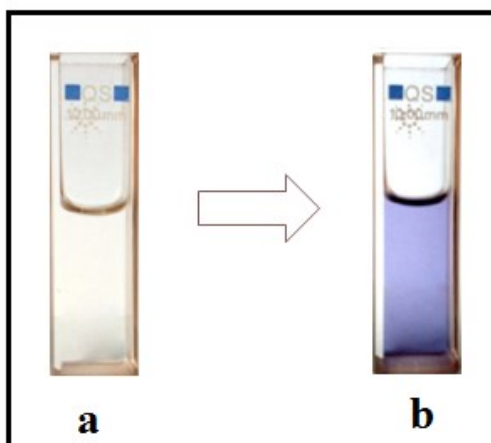

**Fig. S2.** Color changes observed a) before b) after the addition of 10 equiv of  $\text{H}_2\text{O}_2$  in presence of 5 equiv TEA (triethylamine) to the solution of **1** in acetonitrile. The purple colour solution is species **1a**.

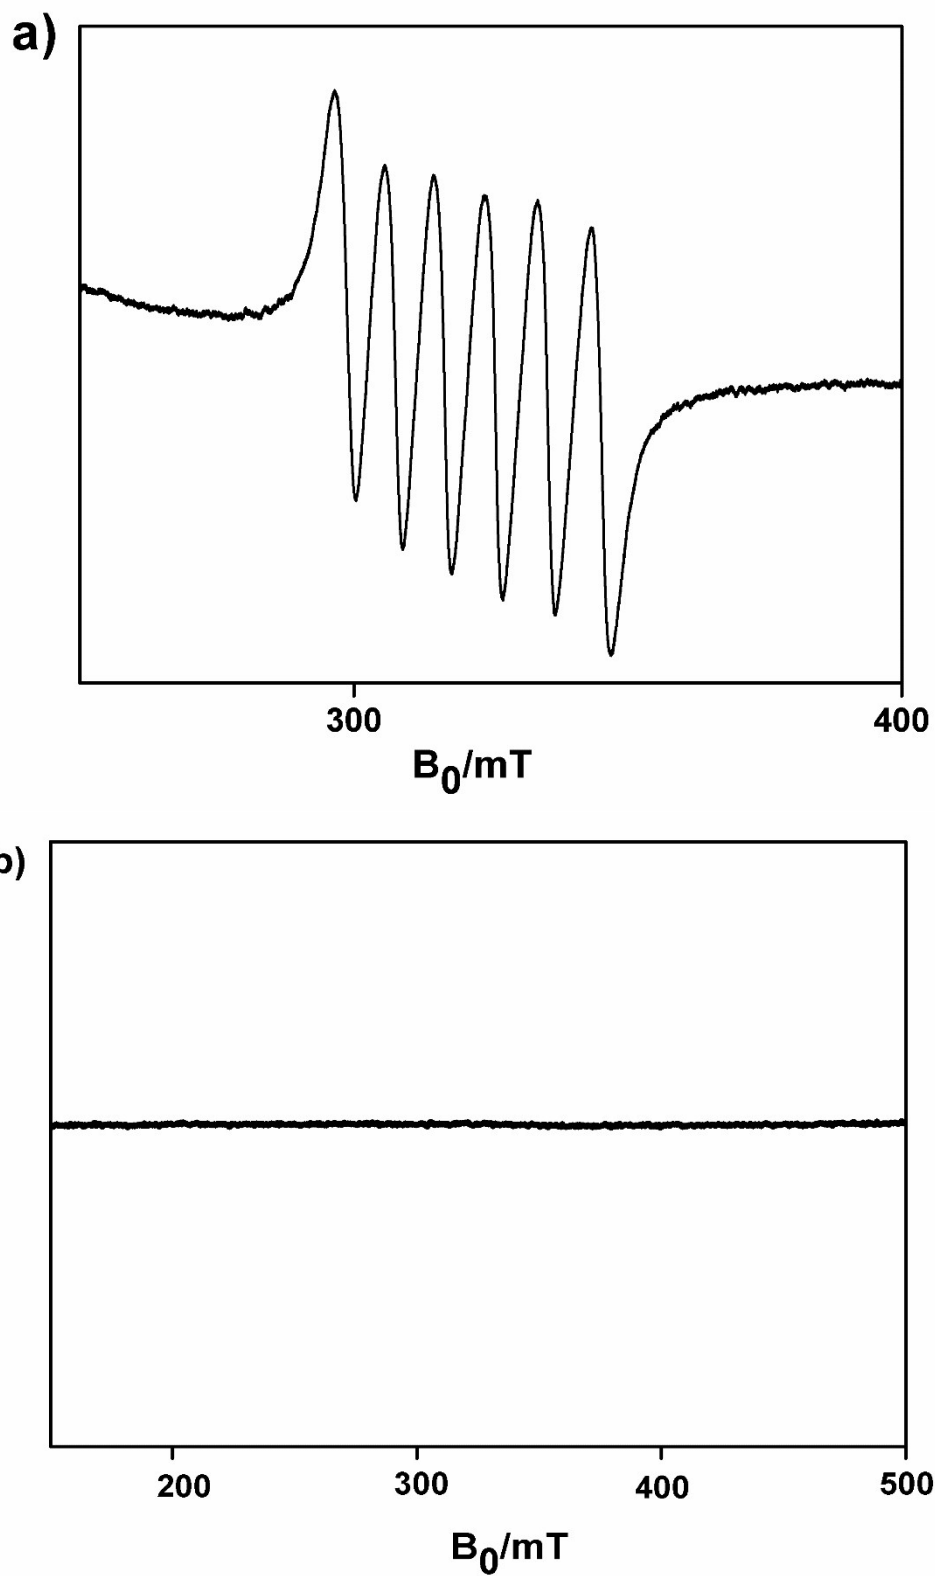

**Fig. S3.** The X-band EPR spectrum of **1** (top) (Ref S24) and **1a** (bottom) in  $\text{CH}_3\text{CN}$  recorded at 77 K.

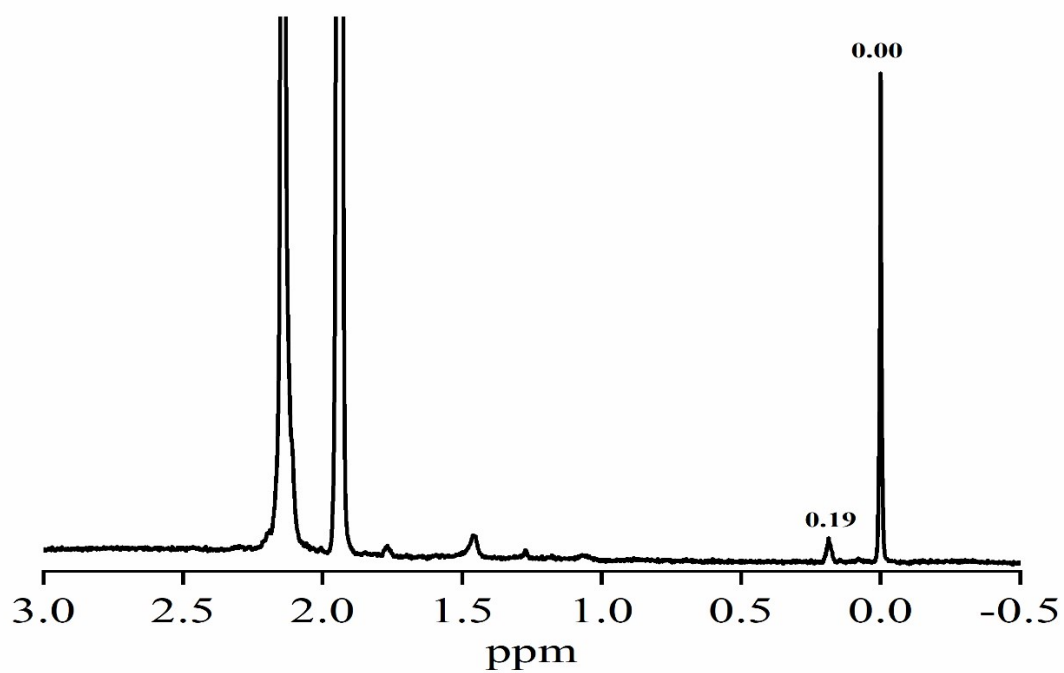

(a)

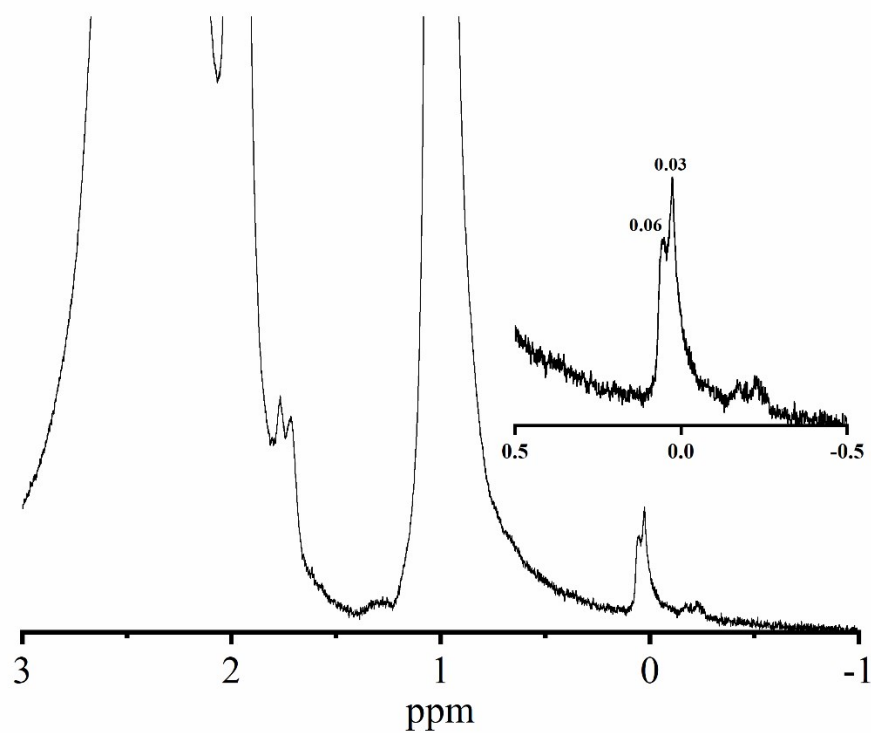

(b)

**Fig. S4.** Evans method  $^1\text{H}$  NMR spectra of **1** (top) and **1a** (bottom) used to obtain the magnetic moments of **1** and **1a** respectively. Using Evans method magnetic moment ( $\mu$ ) for **1** is 5.97 BM while for **1a** it is 2.91 BM.

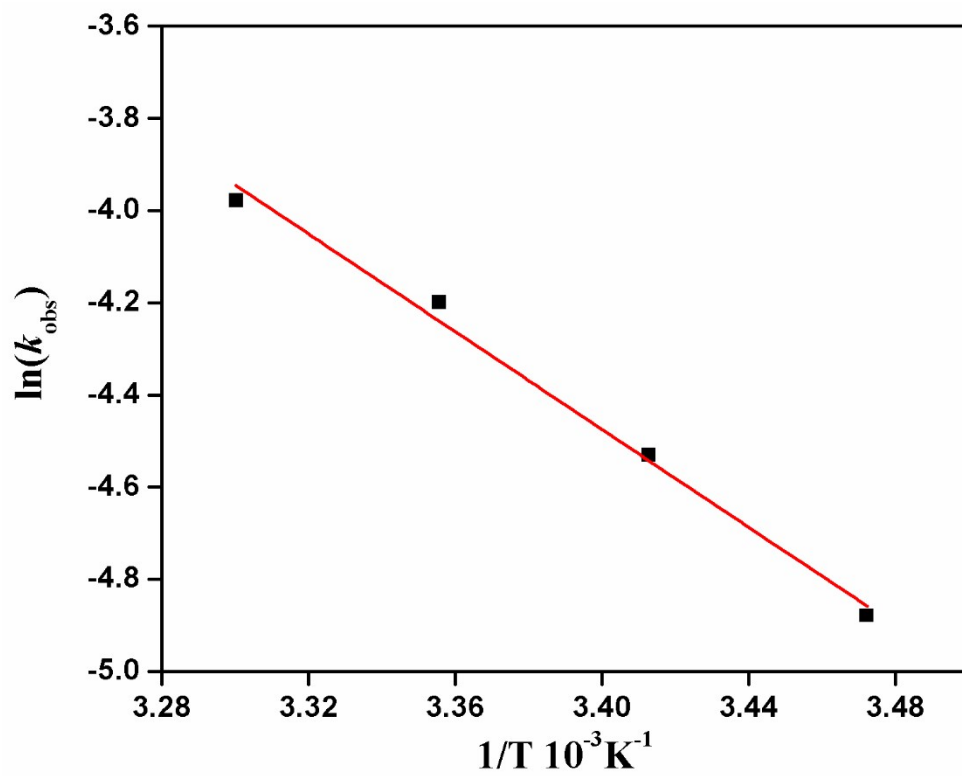

**Fig. S5** Plot of first-order rate constants against  $1/T$  to determine activation energy for the reaction of 1a (1mM) and 60 equiv of 2-PPA.

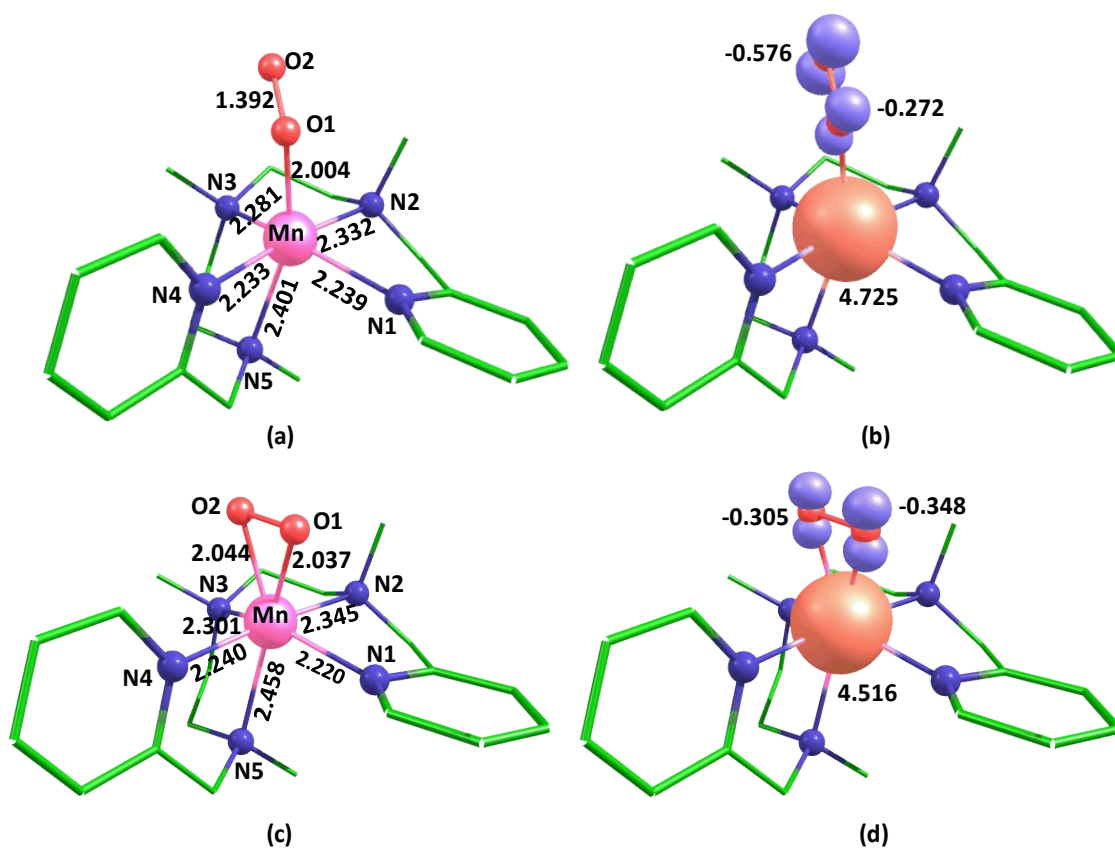

**Fig. S6.** B3LYP-D2 optimized structures and spin density plots of the ground state of end-on  $[\text{Mn}(\text{N}_3\text{Py}_2)(\eta^1\text{-O}_2)]^+$  (a and b) and side-on  $[\text{Mn}(\text{N}_3\text{Py}_2)(\eta^2\text{-O}_2)]^+$  (c and d) species.

**Table S1:** List of the Mn<sup>III</sup>-peroxo prepared by a different synthetic approach along with their UV-Vis spectral features and thermal stability.

| Sr. No.    | Mn-Peroxo complex                                                                                                                    | UV-Vis features<br>$\lambda_{\max}$ nm (L mol <sup>-1</sup> cm <sup>-1</sup> ) (thermal stability or $t_{1/2}$ ) | Ref.      |
|------------|--------------------------------------------------------------------------------------------------------------------------------------|------------------------------------------------------------------------------------------------------------------|-----------|
| <b>I</b>   | <b>Reaction of Mn<sup>II</sup> complex with H<sub>2</sub>O<sub>2</sub></b>                                                           |                                                                                                                  |           |
| 1          | [Mn <sup>III</sup> (O <sub>2</sub> )(Tp <sup><i>i</i>Pr<sub>2</sub></sup> ) pz <sup><i>i</i>Pr<sub>2</sub></sup> ]<br>(brown isomer) | 561 (50), (stable at RT for few h)                                                                               | [S4]      |
| 2          | [Mn <sup>III</sup> (O <sub>2</sub> )(Tp <sup><i>i</i>Pr<sub>2</sub></sup> ) pz <sup><i>i</i>Pr<sub>2</sub></sup> ]<br>(blue isomer)  | 583 (60), (stable at RT for few h)                                                                               | [S4]      |
| 3          | [Mn <sup>III</sup> (O <sub>2</sub> )(Tp <sup><i>i</i>Pr<sub>2</sub></sup> )(Me-Im)]                                                  | 381 (314), 478 (173)                                                                                             | [S5]      |
| <b>II</b>  | <b>Reaction of Mn<sup>II</sup> complex with H<sub>2</sub>O<sub>2</sub> in presence of TEA</b>                                        |                                                                                                                  |           |
| a4         | [Mn <sup>III</sup> (O <sub>2</sub> )(L <sup>7</sup> py <sub>2</sub> <sup>H</sup> )] <sup>+</sup>                                     | 445 (280), 590(120)(15min at 0°C)                                                                                | [S6]      |
| a5         | [Mn <sup>III</sup> (O <sub>2</sub> )(L <sup>7</sup> py <sub>2</sub> <sup>6-Me</sup> )] <sup>+</sup>                                  | 415 (280), 620 (80) (6 min at 0°C)                                                                               | [S6]      |
| a6         | [Mn <sup>III</sup> (O <sub>2</sub> )(L <sup>7</sup> py <sub>2</sub> <sup>6-MeO</sup> )] <sup>+</sup>                                 | 416 (250), 560(80) (~ seconds at 0°C)                                                                            | [S6]      |
| a7         | [Mn <sup>III</sup> (O <sub>2</sub> )(L <sup>7</sup> py <sub>2</sub> <sup>5-Br</sup> )] <sup>+</sup>                                  | 445 (220), 589 (90) (3 min at 0 °C)                                                                              | [S6]      |
| 8          | [Mn <sup>III</sup> (O <sub>2</sub> )(L <sup>7</sup> q <sub>2</sub> )] <sup>+</sup>                                                   | 415 (305), 606 (70) (4 min at 0°C)                                                                               | [S7]      |
| 9          | [Mn <sup>III</sup> (O <sub>2</sub> )(L <sup>7</sup> py <sub>2</sub> <sup>4-Me</sup> )] <sup>+</sup>                                  | 445(260), 588(100) (6 min at 0°C)                                                                                | [S7]      |
| 10         | [Mn <sup>III</sup> (O <sub>2</sub> )(L <sup>8</sup> py <sub>2</sub> <sup>H</sup> )] <sup>+</sup>                                     | 465 (280), 599 (120) (12 min at 0°C)                                                                             | [S7]      |
| 11         | [Mn <sup>III</sup> (O <sub>2</sub> )(L <sup>7</sup> py <sub>2</sub> <sup>4-Cl</sup> )] <sup>+</sup>                                  | 442 (262), 568(102) (10 min at 0°C)                                                                              | [S8]      |
| 12         | [Mn <sup>III</sup> (O <sub>2</sub> )(L <sup>7</sup> iso-q <sub>2</sub> )] <sup>+</sup>                                               | 446 (291), 587 (112) (30 min at 0°C)                                                                             | [S8]      |
| 13         | [Mn <sup>III</sup> (O <sub>2</sub> )(14-TMC)] <sup>+</sup>                                                                           | 453 (490), 630 (120) (5 h at 25 °C)                                                                              | [S9]      |
| b14        | [Mn <sup>III</sup> (O <sub>2</sub> )(13-TMC)] <sup>+</sup>                                                                           | 452 (390), 615 (190) (several days at 25 °C)                                                                     | [S10,S11] |
| 15         | [Mn <sup>III</sup> (O <sub>2</sub> )(12-TMC)] <sup>+</sup>                                                                           | 455 (250), 620 (200) (Stability ND)                                                                              | [S12]     |
| 16         | [Mn <sup>III</sup> (O <sub>2</sub> )(L2)] <sup>+</sup>                                                                               | 440 (175), 597 (41) (4 min at 0°C)                                                                               | [S13]     |
| 17         | [Mn <sup>III</sup> (O <sub>2</sub> )(L3)] <sup>+</sup>                                                                               | 434 (214) , 592 (42) (22 min at 0°C)                                                                             | [S13]     |
| 18         | [Mn <sup>III</sup> (O <sub>2</sub> )(L4)] <sup>+</sup>                                                                               | 435 (149) , 558 (39) (6 min at 0°C)                                                                              | [S13]     |
| 19         | [Mn <sup>III</sup> (O <sub>2</sub> )(Pro3Py)] <sup>+</sup>                                                                           | 580 (200) (2 h at 0°C)                                                                                           | [S14]     |
| 20         | [Mn <sup>III</sup> (O <sub>2</sub> )(L <sup>1</sup> )] <sup>+</sup>                                                                  | 605 (270) (60 min. at 15 °C)                                                                                     | [S15]     |
| 21         | [Mn <sup>III</sup> (O <sub>2</sub> )(L <sup>2</sup> )] <sup>+</sup>                                                                  | 450 (160) (100 sec. at 15°C)                                                                                     | [S16]     |
| 22         | [Mn <sup>III</sup> (O <sub>2</sub> )( Pro3Bzim)] <sup>+</sup>                                                                        | 540 (140) (30 min at 20°C)                                                                                       | [S17]     |
| <b>III</b> | <b>Reaction of Mn<sup>II</sup> complex with KO<sub>2</sub></b>                                                                       |                                                                                                                  |           |
| 23         | [Mn <sup>III</sup> (O <sub>2</sub> )(TPP)] <sup>-</sup>                                                                              | 983 (50)                                                                                                         | [S18]     |
| 24         | [Mn <sup>III</sup> (O <sub>2</sub> )(Tp <sup>Ph<sub>2</sub></sup> )(THF)]                                                            | 379 (324), 436(73) (4.5 days stability)                                                                          | [S19]     |
| 25         | [Mn <sup>III</sup> (O <sub>2</sub> )( Me <sub>2</sub> EBC)] <sup>+</sup>                                                             | 650 (530), 400 (185) (decays within 40 min at -60 °C)                                                            | [S20]     |
| <b>IV</b>  | <b>Reaction of Mn<sup>II</sup> complex with electrochemically generated O<sub>2</sub><sup>-</sup></b>                                |                                                                                                                  |           |
| a,c26      | [Mn <sup>III</sup> (O <sub>2</sub> )(imL <sub>5</sub> <sup>2</sup> )] <sup>+</sup>                                                   | 542 (484)                                                                                                        | [S21]     |



|                   |                                                                                   |                     |       |
|-------------------|-----------------------------------------------------------------------------------|---------------------|-------|
| <sup>a,c</sup> 27 | [Mn <sup>III</sup> (O <sub>2</sub> )(mL <sub>5</sub> <sup>2</sup> )] <sup>+</sup> | 585 (335)           | [S21] |
| <sup>a,c</sup> 28 | [Mn <sup>III</sup> (O <sub>2</sub> )(N4py)] <sup>+</sup>                          | 617 (280)           | [S21] |
| <b>V</b>          | <b>Reaction of Mn<sup>II</sup> complex with dioxygen</b>                          |                     |       |
| 29                | [Mn <sup>III</sup> (O <sub>2</sub> )(H <sub>2</sub> bupa)] <sup>-</sup>           | 660 (300), 490 (ND) | [S22] |
| <sup>a</sup> 30   | [Mn <sup>III</sup> (O <sub>2</sub> )(H <sub>2</sub> bpa)]                         | 590 (58), 460 (ND)  | [S23] |

Note: Mn(III)-peroxo species can also be prepared using a) KO<sub>2</sub>; b) O<sub>2</sub> and c) H<sub>2</sub>O<sub>2</sub> oxidants.

**Table S2:** Computed structural parameters for Mn(III) peroxo intermediate.

| <i>end-on [Mn(N<sub>3</sub>Py<sub>2</sub>)(η<sup>1</sup>-O<sub>2</sub>)]<sup>+</sup> (1a<sub>1</sub>)</i>  |       |       |       |       |       |       |       |       |          |          |          |          |          |
|------------------------------------------------------------------------------------------------------------|-------|-------|-------|-------|-------|-------|-------|-------|----------|----------|----------|----------|----------|
| B3LYP-D2                                                                                                   |       |       |       |       |       |       |       |       |          |          |          |          |          |
|                                                                                                            | Mn-O1 | Mn-O2 | O1-O2 | Mn-N1 | Mn-N2 | Mn-N3 | Mn-N4 | Mn-N5 | Mn-O1-O2 | Mn-O2-O1 | O1-Mn-N5 | N1-Mn-N3 | N2-Mn-N4 |
| HS                                                                                                         | 2.004 |       | 1.392 | 2.239 | 2.332 | 2.281 | 2.233 | 2.401 | 122.6    |          | 157.3    | 146.7    | 172.5    |
| IS                                                                                                         | 1.882 |       | 1.402 | 2.032 | 2.143 | 2.136 | 2.045 | 2.240 | 119.6    |          | 164.5    | 158.0    | 174.9    |
| LS                                                                                                         | 1.746 |       | 1.412 | 2.043 | 2.123 | 2.120 | 2.098 | 2.264 | 128.9    |          | 156.7    | 157.4    | 172.2    |
| B3LYP                                                                                                      |       |       |       |       |       |       |       |       |          |          |          |          |          |
| HS                                                                                                         | 2.040 |       | 1.391 | 2.281 | 2.357 | 2.323 | 2.271 | 2.475 | 121.3    |          | 153.4    | 142.2    | 173.2    |
| IS                                                                                                         | 1.892 |       | 1.400 | 2.061 | 2.157 | 2.172 | 2.065 | 2.304 | 118.8    |          | 163.8    | 144.2    | 174.3    |
| LS                                                                                                         | 1.913 |       | 1.385 | 2.063 | 2.150 | 2.163 | 2.081 | 2.292 | 123.5    |          | 160.0    | 151.5    | 172.5    |
| <i>side-on [Mn(N<sub>3</sub>Py<sub>2</sub>)(η<sup>2</sup>-O<sub>2</sub>)]<sup>+</sup> (1a<sub>2</sub>)</i> |       |       |       |       |       |       |       |       |          |          |          |          |          |
| B3LYP-D2                                                                                                   |       |       |       |       |       |       |       |       |          |          |          |          |          |
| HS                                                                                                         | 2.037 | 2.044 | 1.443 | 2.220 | 2.345 | 2.301 | 2.240 | 2.458 | 69.5     | 69.0     | 154.0    | 141.9    | 174.9    |
| IS                                                                                                         | 1.843 | 2.013 | 1.497 | 2.075 | 2.119 | 2.270 | 2.043 | 2.620 | 73.3     | 61.3     | 155.2    | 143.0    | 174.1    |
| LS                                                                                                         | 1.946 | 1.942 | 1.470 | 2.038 | 2.161 | 2.158 | 2.039 | 2.231 | 67.6     | 67.9     | 150.9    | 151.3    | 176.2    |
| B3LYP                                                                                                      |       |       |       |       |       |       |       |       |          |          |          |          |          |
| HS                                                                                                         | 2.068 | 2.063 | 1.439 | 2.259 | 2.376 | 2.338 | 2.275 | 2.540 | 69.4     | 69.8     | 154.6    | 142.2    | 175.9    |
| IS                                                                                                         | 1.839 | 2.023 | 1.495 | 2.101 | 2.130 | 2.340 | 2.061 | 2.669 | 73.9     | 60.9     | 156.8    | 144.2    | 175.6    |
| LS                                                                                                         | 1.946 | 1.939 | 1.471 | 2.060 | 2.176 | 2.181 | 2.051 | 2.275 | 67.5     | 68.0     | 151.1    | 151.5    | 175.3    |

Note: HS=High spin, IS=Intermediate spin and LS=Low spin

**Table S3:** Computed Mulliken spin densities for Mn(III) peroxo intermediate.

| <i>end-on [Mn(N<sub>3</sub>Py<sub>2</sub>)(η<sup>1</sup>-O<sub>2</sub>)]<sup>+</sup> (1a<sub>1</sub>)</i>  |        |        |        |
|------------------------------------------------------------------------------------------------------------|--------|--------|--------|
| B3LYP-D2                                                                                                   |        |        |        |
| Side-on                                                                                                    | Mn     | O1     | O2     |
| HS                                                                                                         | 4.726  | -0.272 | -0.576 |
| IS                                                                                                         | 1.232  | 0.377  | 0.465  |
| Ls                                                                                                         | 0.000  | 0.000  | 0.000  |
| B3LYP                                                                                                      |        |        |        |
| HS                                                                                                         | 4.769  | -0.288 | -0.600 |
| IS                                                                                                         | 1.207  | 0.3753 | 0.487  |
| Ls                                                                                                         | -1.046 | 0.602  | 0.361  |
| <i>side-on [Mn(N<sub>3</sub>Py<sub>2</sub>)(η<sup>2</sup>-O<sub>2</sub>)]<sup>+</sup> (1a<sub>2</sub>)</i> |        |        |        |
| B3LYP-D2                                                                                                   |        |        |        |
| HS                                                                                                         | 4.516  | -0.348 | -0.305 |
| IS                                                                                                         | 2.138  | -0.035 | -0.087 |
| Ls                                                                                                         | 0.000  | 0.000  | 0.000  |
| B3LYP                                                                                                      |        |        |        |
| HS                                                                                                         | 4.576  | -0.371 | -0.329 |
| IS                                                                                                         | 2.157  | -0.039 | -0.096 |
| Ls                                                                                                         | 0.000  | 0.000  | 0.000  |

**Table S4:** B3LYP-D2 computed potential energy surface (ΔG in kJ mol<sup>-1</sup>) for Mn(III) peroxo intermediate.

| B3LYP-D2                                                                                                   |       |
|------------------------------------------------------------------------------------------------------------|-------|
| <i>side-on [Mn(N<sub>3</sub>Py<sub>2</sub>)(η<sup>2</sup>-O<sub>2</sub>)]<sup>+</sup> (1a<sub>2</sub>)</i> |       |
| HS                                                                                                         | 0     |
| IS                                                                                                         | 99.6  |
| Ls                                                                                                         | 152.6 |
| <i>end-on [Mn(N<sub>3</sub>Py<sub>2</sub>)(η<sup>1</sup>-O<sub>2</sub>)]<sup>+</sup> (1a<sub>1</sub>)</i>  |       |
| HS                                                                                                         | 14.6  |
| IS                                                                                                         | 122.2 |
| Ls                                                                                                         | 179.1 |
| B3LYP                                                                                                      |       |
| <i>side-on [Mn(N<sub>3</sub>Py<sub>2</sub>)(η<sup>2</sup>-O<sub>2</sub>)]<sup>+</sup> (1a<sub>2</sub>)</i> |       |
| HS                                                                                                         | 0     |
| IS                                                                                                         | 116.8 |
| Ls                                                                                                         | 182.5 |
| <i>end-on [Mn(N<sub>3</sub>Py<sub>2</sub>)(η<sup>1</sup>-O<sub>2</sub>)]<sup>+</sup> (1a<sub>1</sub>)</i>  |       |
| HS                                                                                                         | 10.7  |
| IS                                                                                                         | 145.5 |
| Ls                                                                                                         | 223.5 |

Kinetic data, thermodynamic parameters as well as product analysis data with standard deviation are also shown as below

1. Determination of second-order rate constant ( $k_2$ ) for 2-PPA and 2-PPA-*d* with standard deviations (shown in bracket)

| Reactivity of   | $k_2$ second-order rate constant (from graph) $\text{M s}^{-1}$ |
|-----------------|-----------------------------------------------------------------|
| 2-PPA           | $1.59 (0.23) \times 10^{-1} \text{ M s}^{-1}$                   |
| 2-PPA- <i>d</i> | $9.3374 (0.47) \times 10^{-2} \text{ M s}^{-1}$                 |

2. Calculation for Eyring plot to obtain  $\Delta H$  and  $\Delta S$  with PPA-*d* with standard deviations (shown in bracket)

$$\Delta H = 42 (\pm 2) \text{ kJ mol}^{-1}$$

$$\Delta S = -139 (\pm 4) \text{ J mol}^{-1}\text{K}^{-1}$$

$$E_a = 42 (\pm 1) \text{ kJ mol}^{-1}$$

3. Product analysis with a standard deviation (shown in bracket)

$$\% \text{ of acetophenone formed based on 1a} = 88 (\pm 2) \%$$

4. Product analysis with a standard deviation (shown in bracket)

$$\% \text{ of cyclohexene formed based on 1a} = 70 (\pm 2) \%$$

## References in SI

- S1. D. F. Evans, *J. Chem. Soc.* 1959, 2003-2005.
- S2. J. Lölinger, R. Scheffold, *J. Chem. Edu.*, 1972, 646-647.
- S3. D. F. Evans, D. A. Jakubovic, *J. Chem. Soc. Dalton Trans.* 1988, 2927-2933.
- S4 N. Kitajima, H. Komatsuzaki, S. Hikichi, M. Osawa, Y. Moro-oka, *J. Am. Chem. Soc.* 1994, **116**, 11596–11597.
- S5 U.P. Singh, A.K. Sharma, S. Hikichi, H. Komatsuzaki, Y. Moro-oka, M. Akita, *Inorg. Chim. Acta.*, 2006, 359, 4407–4411.
- S6 R.A. Geiger, S. Chattopadhyay, V.W. Day, T.A. Jackson, *J. Am. Chem. Soc.*, 2010, **132**, 2821–2831.
- S7 R.A. Geiger, S. Chattopadhyay, V.W. Day, T.A. Jackson, *Dalton Trans.*, 2011, **40**, 1707-1715.
- S8 R.A. Geiger, G.B. Wijeratne, V.W. Day, T.A. Jackson, *Eur. J. Inorg. Chem.*, 2012, 1598-1608.
- S9 M.S. Seo, J.Y. Kim, J. Annaraj, Y. Kim, Y.M. Lee, S.J. Kim, J. Kim, W. Nam, *Angew. Chem. Int. Ed.*, 2007, **46**, 377–380.
- S10 J. Annaraj, J. Cho, Y.-M. Lee, S.Y. Kim, R. Latifi, S.P. de Visser, W. Nam, *Angew. Chem. Int. Ed.*, 2009, **48**, 4150-4153.
- S11 M. Sankaralingam, Y.M. Lee, S.H. Jeon, M.S. Seo, K. bin Cho, W. Nam, *Chem. Commun.*, 2018, **54**, 1209-1212.
- S12 H. Kang, J. Cho, K.-B. Cho, T. Nomura, T. Ogura, W. Nam, *Chem. Eur. J.*, 2013, **19**, 14119-14125.
- S13 N. Saravanan, M. Sankaralingam, M. Palaniandavar, *RSC Adv.*, 2014, **4**, 1200-1211.
- S14 J. Du, D. Xu, C. Zhang, C. Xia, Y. Wang, W. Sun, *Dalton Trans.*, 2016, **45**, 10131-10135.
- S15 P. Barman, P. Upadhyay, A.S. Faponle, J. Kumar, S.S. Nag, D. Kumar, C. V. Sastri, S. P. de Visser, *Angew. Chem. Int. Ed.*, 2016, **55**, 11091-11095.
- S16 F. G. Cantú Reinhard, P. Barman, G. Mukherjee, J. Kumar, D. Kumar, D. Kumar, C. V. Sastri, S.P. de Visser, *J. Am. Chem. Soc.*, 2017, **139**, 18328-18338.

- S17 J. Du, C. Miao, C. Xia, W. Sun, *Chin. Chem. Lett.*, 2018, **29**, 1869-1871.
- S18 R. B. Vanatta, C.E. Strouse, L.K. Hanson, J.S. Valentine, *J. Am. Chem. Soc.*, 1987, **109**, 1425-1434.
- S19 H. E. Colmer, R. A. Geiger, D. F. Leto, G. B. Wijeratne, V. W. Day, T. A. Jackson, *Dalton Trans.*, 2014, **43**, 17947-17963.
- S20 H. E. Colmer, A.W. Howcroft, T.A. Jackson, *Inorg. Chem.*, 2016, **55**, 2055-2069.
- S21 S. el Ghachtouli, H.Y.V. Ching, B. Lassalle-Kaiser, R. Guillot, D.F. Leto, S. Chattopadhyay, T. Jackson, P. Dorlet, E. Anxolabéhère-Mallart, *Chem. Commun.*, 2013, **49**, 5696-5698..
- S22 R. L. Shook, W.A. Gunderson, J. Greaves, J.W. Ziller, M.P. Hendrich, A.S. Borovik, *J. Am. Chem. Soc.*, 2008, **130**, 8888-8889.
- S23 R. L. Shook, A.S. Borovik, *Inorg. Chem.*, 2010, **49**, 3464-3660.
- S24 D. D. Narulkar, K. Devulapally, A. K. U., S. N. Dhuri, V. M. Dhavale, A. K. Vardhaman and L. Giribabu, *Sustain. Energy Fuels*, 2020, **4**, 2656–2660.
